# Supplementary material for: Production of copper-64 using a hospital cyclotron: targetry, purification and quality analysis
Source: PubMed Central journal article supplement (PMC8357037; doi:10.1097/mnm.0000000000001422), 2021-05-05

**Figure 1s**

A 48-year-old patient with lung cancer, example of standardized uptake value (SUV<sub>peak</sub>, defined as the largest possible mean value of a 1cm<sup>3</sup> regions of interest) and manually drawn regions of interest of global lung glycolysis measurement and total lesion glycolysis in axial, sagittal, coronal PET/CT fusion images(A, B, and C, respectively).The yellow outlined the affected side, white color means tumor region

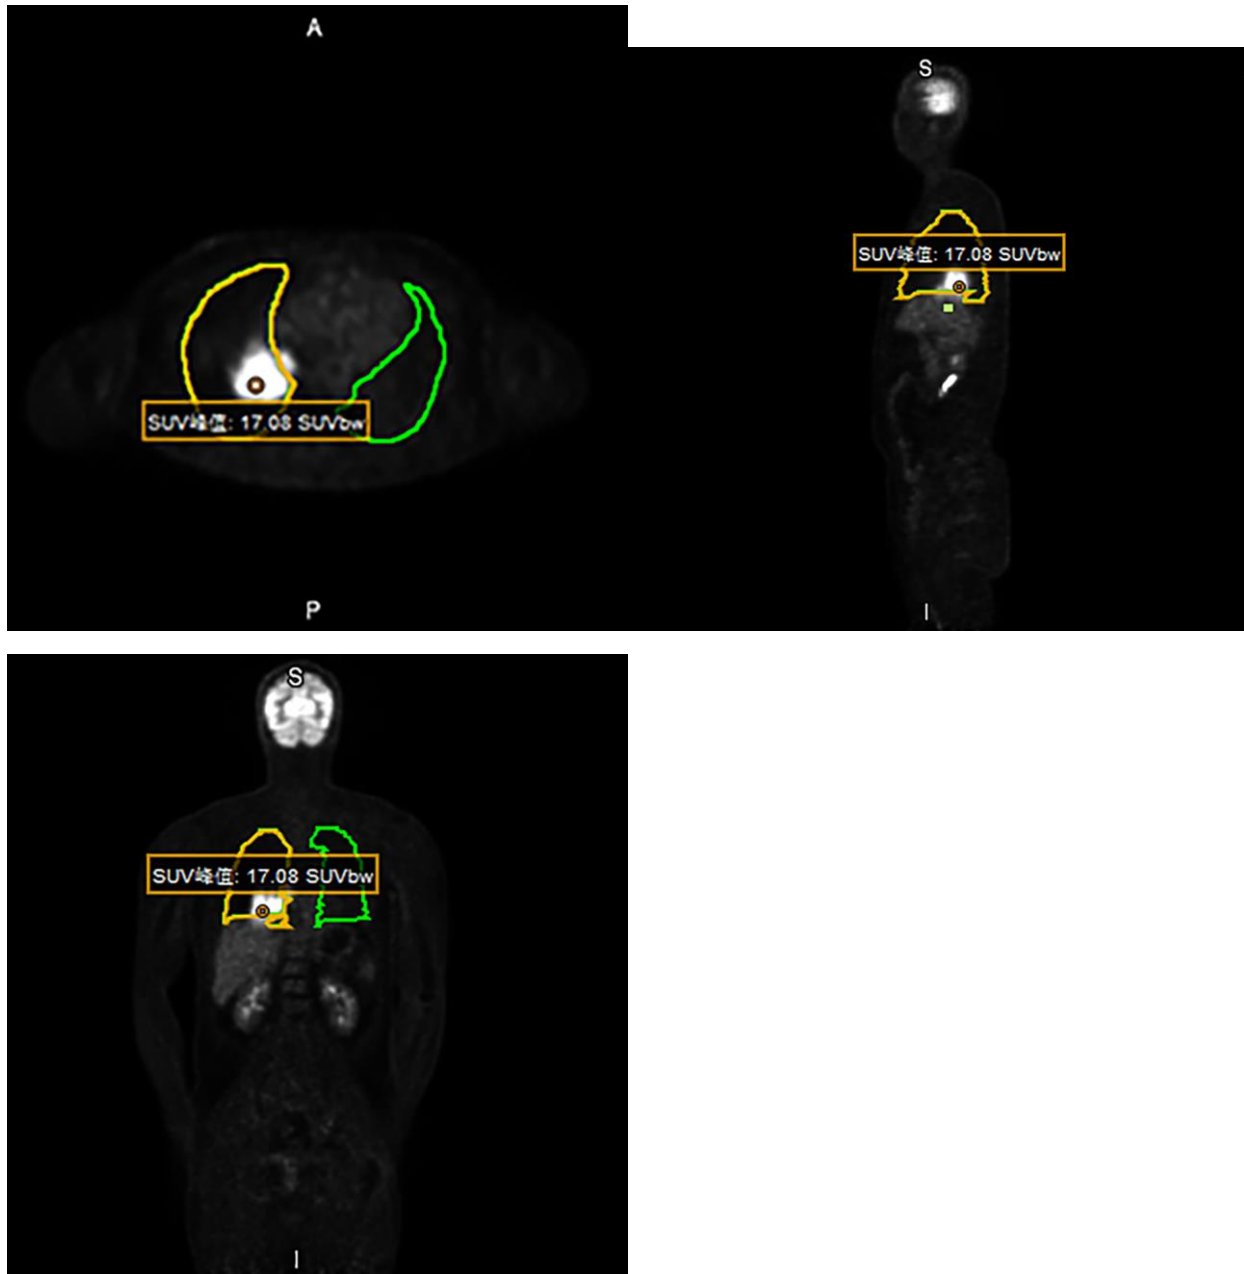

Supplement: nmc-42-1024-s001.pdf [file nmc-42-1024-s001.pdf]
